# Supplementary material for: Probing the Importance of the G-Quadruplex Grooves for the Activity of the Anti-HIV-Integrase Aptamer T30923
Source: MDPI journal article supplement (doi:10.3390/ijms21165637), 2020-08-06
Supplement: s1 [file s1]

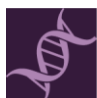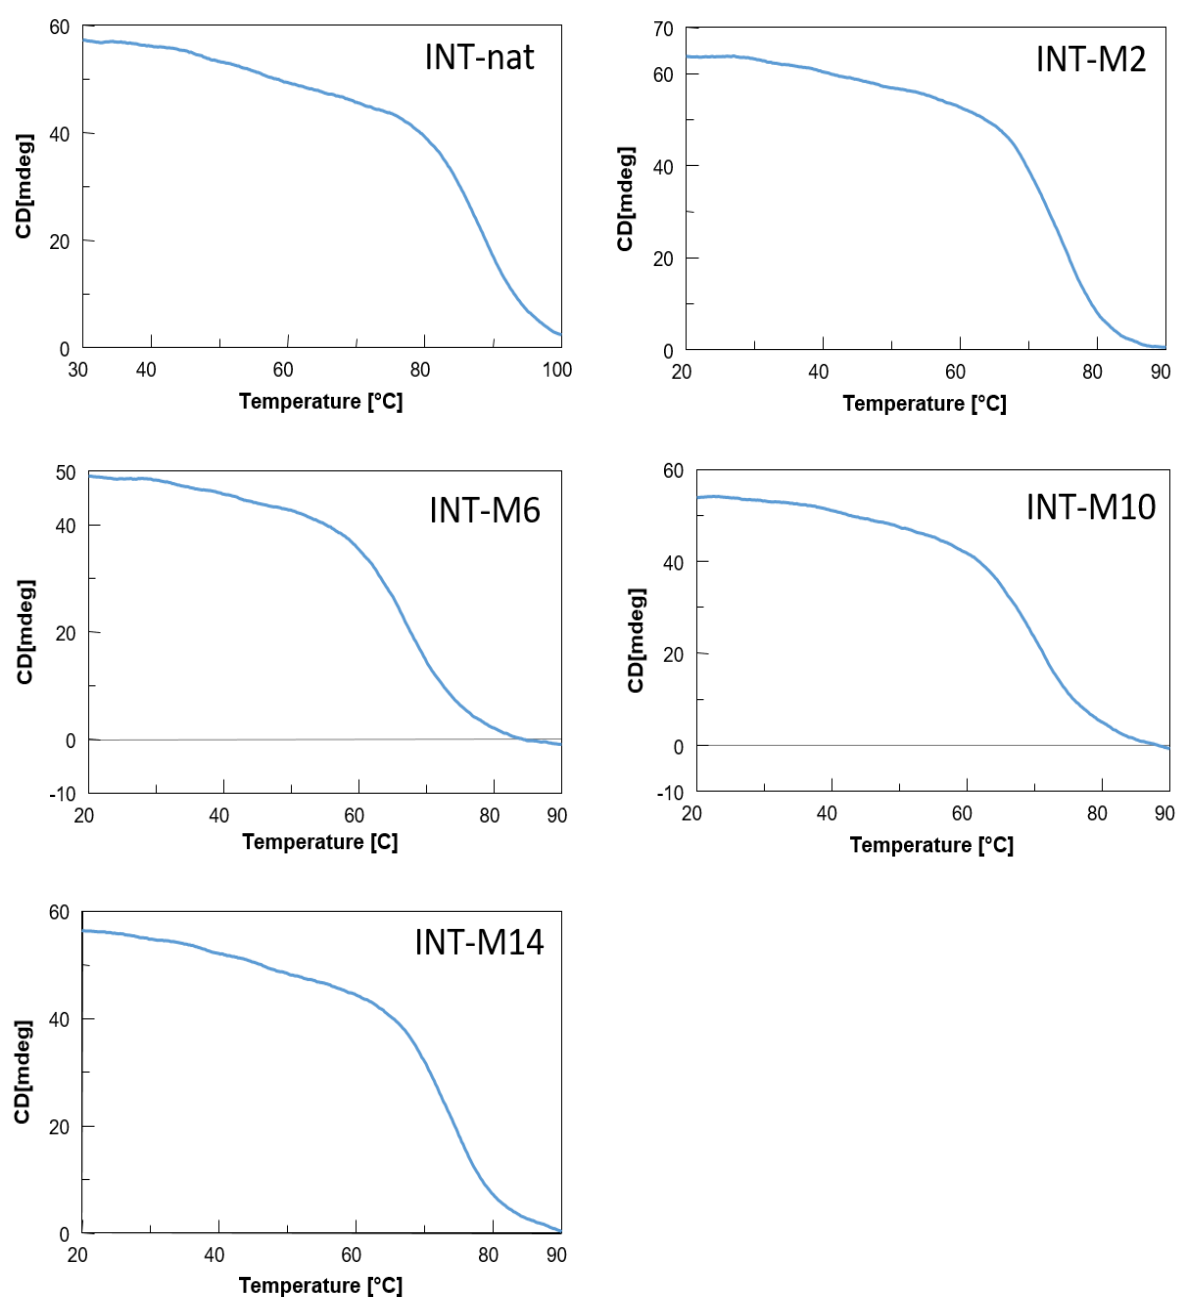

**Figure S1.** CD melting profiles of the modified ODNs at low potassium ion concentrations (5 mM KCl). See Materials and Methods for experimental details.

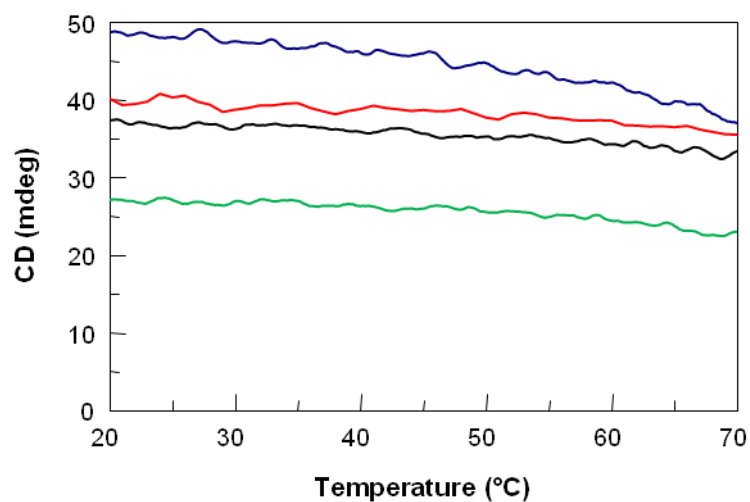

**Figure S2.** CD heating profiles of INT-M2 (blue), INT-M6 (green), INT-M10 (red) and INT-M14 (black) in a buffer 10 mM HEPES, 40 mM MgCl<sub>2</sub>, 1% Glycerol, pH 7.5. See Materials and Methods for experimental details.

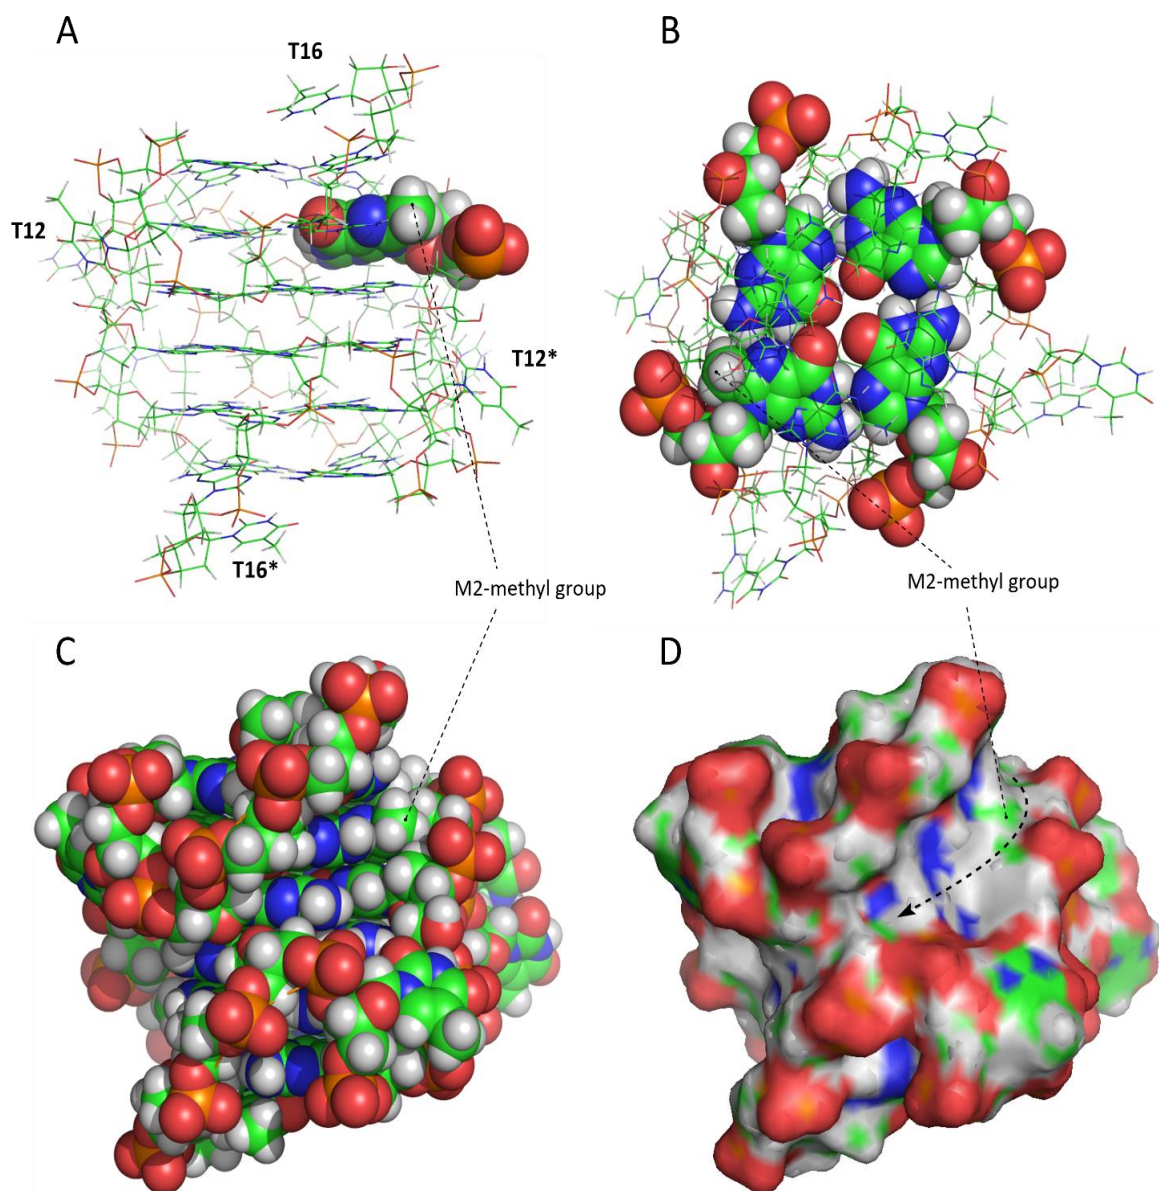

**Figure S3.** G-quadruplex structure adopted by INT-M2. **(A)** Side view of the stick model. The M-residue is reported in CPK. **(B)** Top view of the stick model. The central G-tetrad is in CPK. **(C)** Side view of the CPK model. **(D)** Side view of the surface model. The arrowed dashed-line indicates the groove in which the methyl group is positioned. Heavy atoms are shown with different colors (carbons, green; nitrogens, blue; oxygens, red; hydrogens, white; phosphorus, orange).

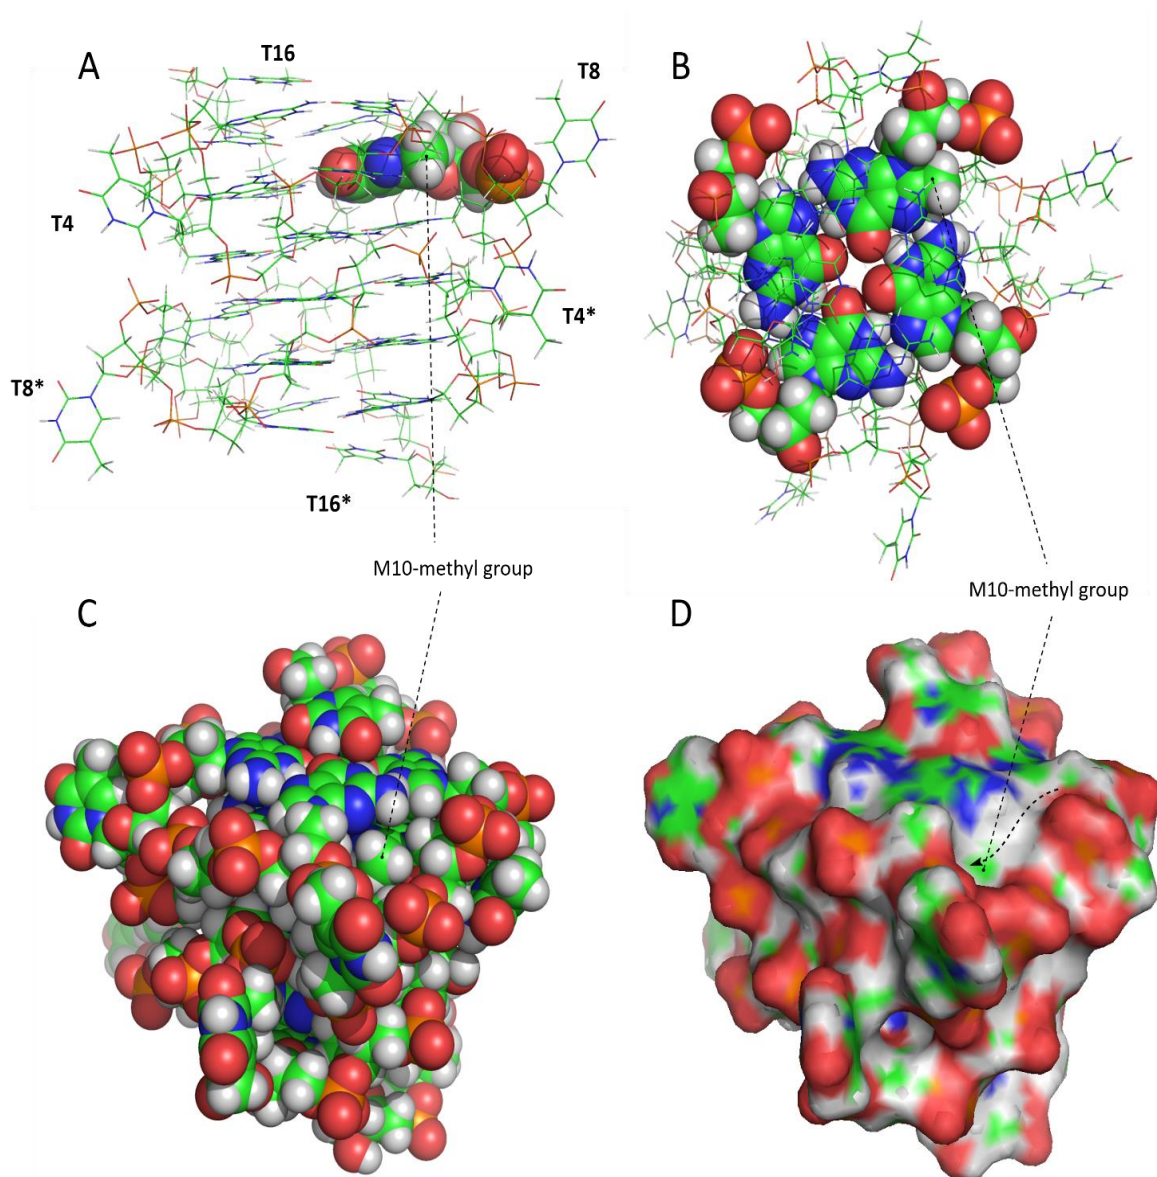

**Figure S4.** G-quadruplex structure adopted by INT-M10. (A) Side view of the stick model. The M-residue is reported in CPK. (B) Top view of the stick model. The central G-tetrad is in CPK. (C) Side view of the CPK model. (D) Side view of the surface model. The arrowed dashed-line indicates the groove in which the methyl group is positioned. Heavy atoms are shown with different colors (carbons, green; nitrogens, blue; oxygens, red; hydrogens, white; phosphorus, orange).



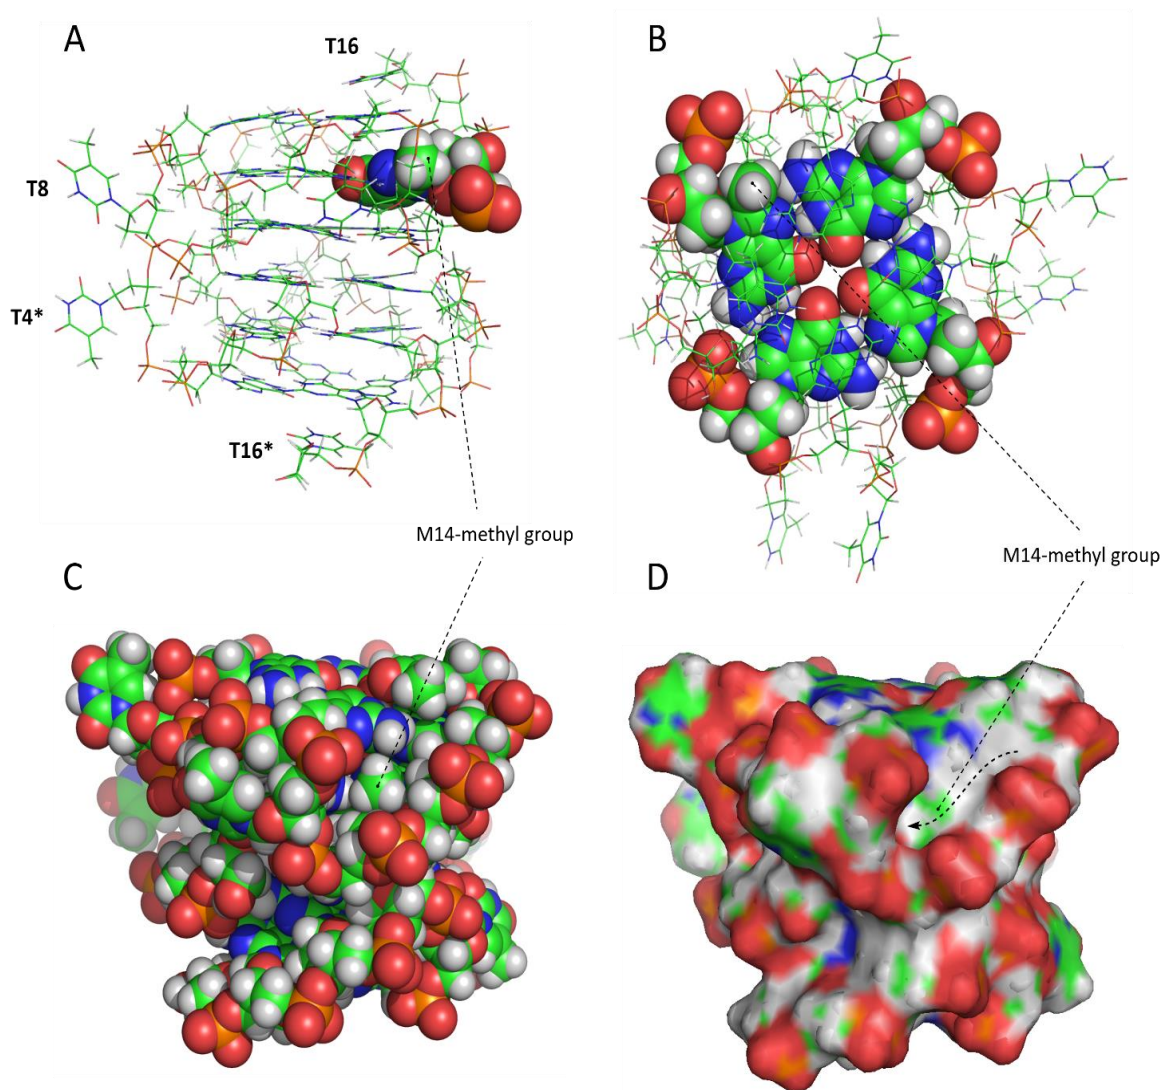

**Figure S5.** G-quadruplex structure adopted by INT-M14. **(A)** Side view of the stick model. The M-residue is reported in CPK. **(B)** Top view of the stick model. The central G-tetrad is in CPK. **(C)** Side view of the CPK model. **(D)** Side view of the surface model. The arrowed dashed-line indicates the groove in which the methyl group is positioned. Heavy atoms are shown with different colors (carbons, green; nitrogens, blue; oxygens, red; hydrogens, white; phosphorus, orange).
